# Supplementary material for: Comparing the Efficacy of Two Generations of EGFR-TKIs: An Integrated Drug-Disease Mechanistic Model Approach in Egfr-Mutant Lung Adenocarcinoma
Source: Preprints.org preprint supplement (doi:10.20944/preprints202402.0640.v1), 2024-02-12
Supplement: Supplementary file 1 [file supplementary]

Archive with 4 entries (4 files):
- PatientDescriptors_PM.xls
- __MACOSX/._PatientDescriptors_PM.xls
- 2024_02___Biomedicines_NSCLC_CM__Supplementary_Material.pdf
- __MACOSX/._2024_02___Biomedicines_NSCLC_CM__Supplementary_Material.pdf
