# Supplementary material for: Comparing the Efficacy of Two Generations of EGFR-TKIs: An Integrated Drug-Disease Mechanistic Model Approach in Egfr-Mutant Lung Adenocarcinoma
Source: Preprints.org preprint supplement (doi:10.20944/preprints202402.0640.v1), 2024-02-12
Supplement: Supplementary file 1 [file supplementary › 2024_02___Biomedicines_NSCLC_CM__Supplementary_Material.pdf]

# Supplementary Materials: Comparing the efficacy of two generations of EGFR-TKIs: an integrated drug-disease mechanistic model approach in EGFR-mutant lung adenocarcinoma

Hippolyte Darré <sup>1</sup>, Perrine Masson <sup>1</sup>, Arnaud Nativel <sup>1</sup>, Laura Villain <sup>1</sup>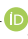, Diane Lefaudeux <sup>1</sup>, Claire Couty <sup>1</sup>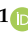, Bastien Martin <sup>1</sup>, Evgueni Jacob <sup>1</sup>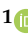, Michaël Duruisseaux <sup>2,3,4</sup>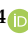, Jean-Louis Palgen <sup>1</sup>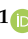, Claudio Monteiro <sup>1</sup>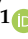, Adèle L’Hostis <sup>1\*</sup>

## 1. Development of the ISELA-V2 model

The ISELA-V1 model is composed of three pillars: (i) a disease model, (ii) a treatment model ; (iii) a virtual population. Each of these pillars was expanded to broaden the context of use of the model: this new model version is named ISELA-V2.

### 1.1. Disease model enhancement

Mechanistic models of the following phenomena were plugged in ISELA-V1 disease model to enhance it:

- A cell cycle and cell death model was implemented to represent the evolution of the layer of proliferative cells in LUAD tumor tissues, with 3 major axes: the cell cycle, the DNA damages reparation pathway and the apoptosis in response to mitogen upstream of EGFR pathways, as well as chemotherapeutic agents.
- A neo-angiogenesis model was developed to follow the dynamic evolution of tumor-induced vascular network, allowing the study of individual endothelial cell subpopulations and their contribution to the overall tumor carrying capacity.

#### 1.1.1. Cell cycle and cell death

This submodel detailed in Figure [S1](#) takes as input the signals arising from the AKT and ERK activation as well mutation on specific proteins to output the growth and death rate of the tumor. It is composed of three main phenomena: the cell cycle, the DNA damage response and the apoptosis. These phenomena are respectively detailed in Figure [S2](#), Figure [S3](#) and Figure [S4](#).

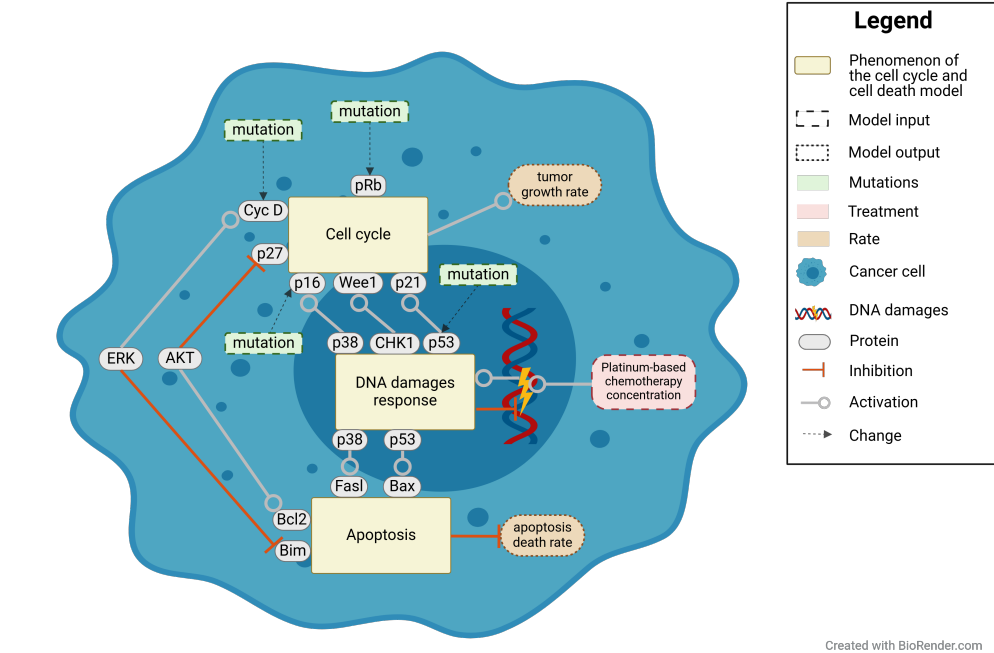

**Figure S1.** Representation of the cell cycle and cell death submodel. Created with [Biorender.com](#)

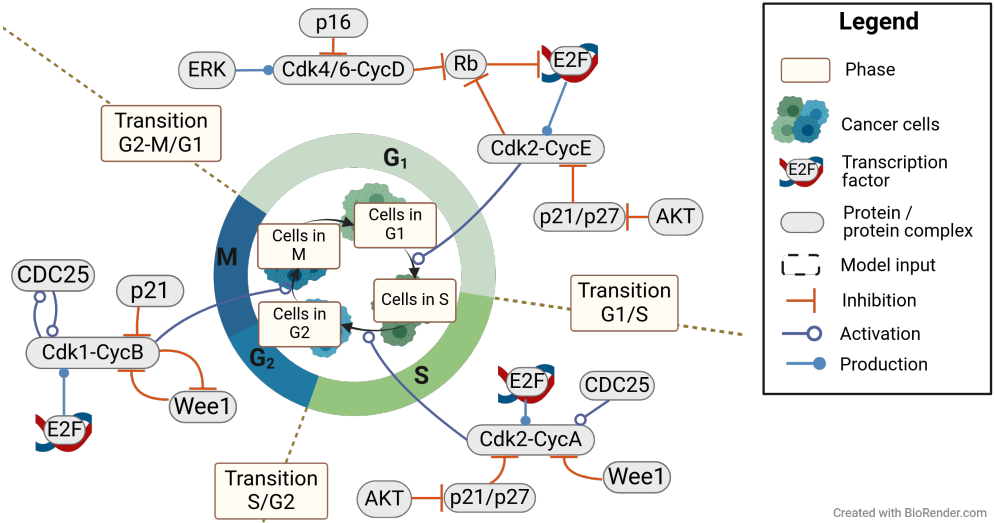

**Figure S2.** Representation of the cell cycle phenomena as implemented in the cell cycle and cell death submodel. Created with [Biorender.com](#)

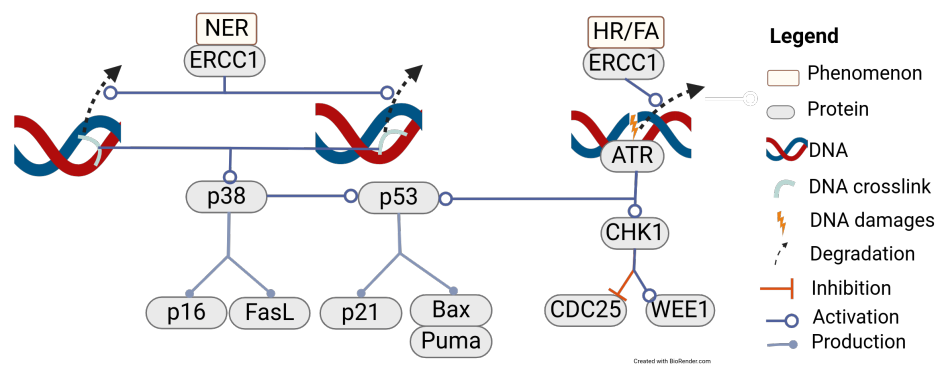

**Figure S3.** Representation of the DNA damage phenomena as implemented in the cell cycle and cell death submodel. Created with [Biorender.com](#).

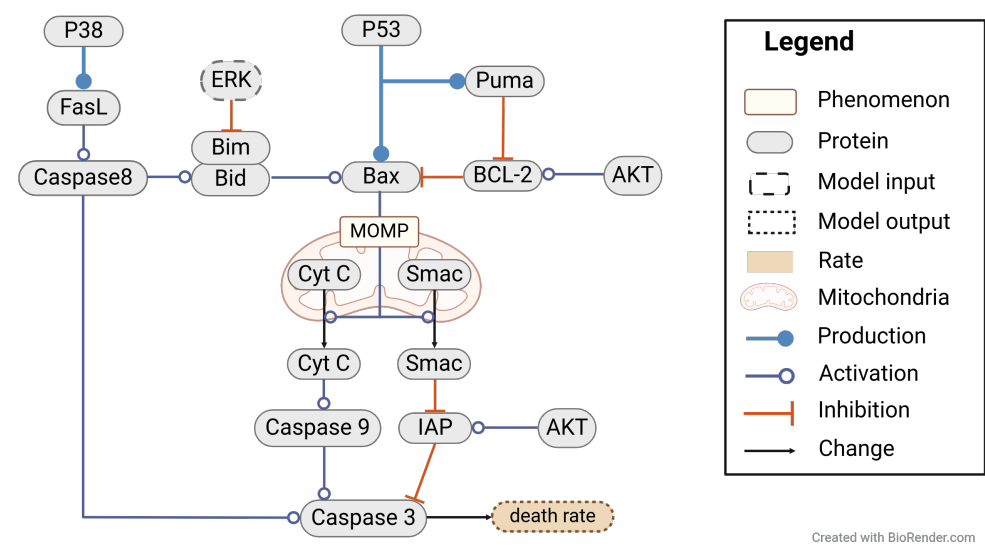

**Figure S4.** Representation of the apoptosis phenomena as implemented in the cell cycle and cell death submodel. Created with [Biorender.com](#).

1.1.2. Neoangiogenesis

21

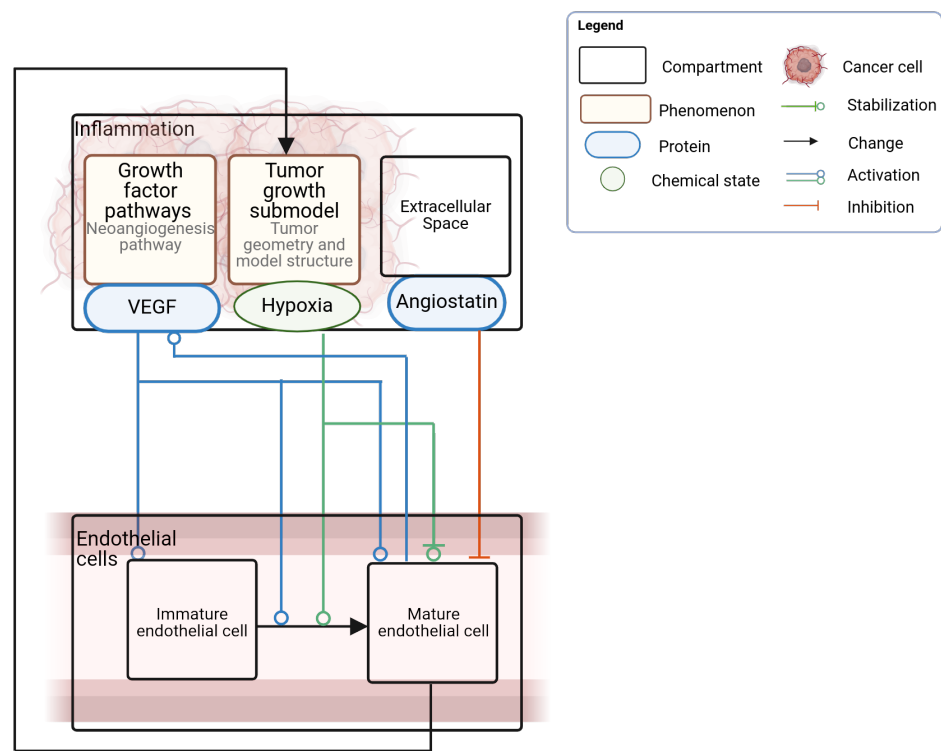

**Figure S5.** Representation of the angiogenesis submodel. Created with [Biorender.com](#).

1.2. Treatment model additions

22

As detailed in the Material & Methods section, osimertinib and gefitinib PBPK treatment models were then added, as well as the emergent mechanisms of resistance observed following osimertinib administration (the mechanisms of resistance to gefitinib were already implemented in ISELA-V1). Osimertinib and gefitinib submodel are respectively detailed in Figure S6 and Figure S7.

23  
24  
25  
26  
27

1.2.1. Osimertinib

28

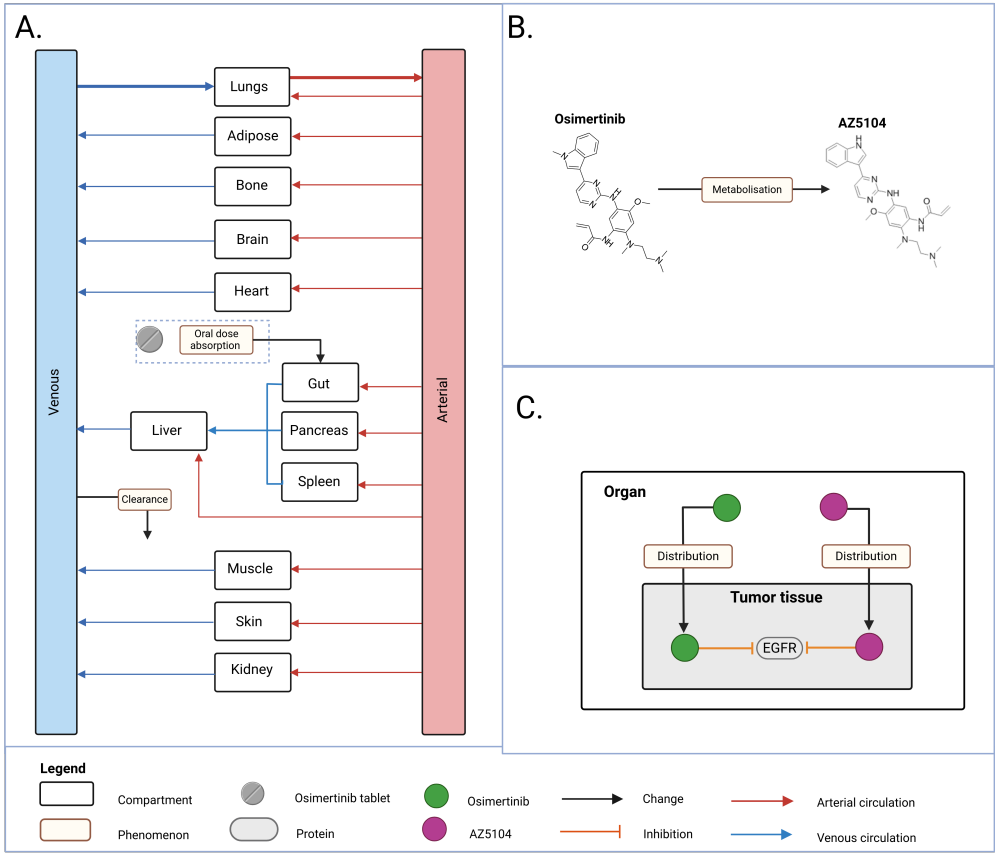

**Figure S6.** Representation of the osimertinib treatment submodel.(A) Pharmacokinetic model of osimertinib. (B) Metabolization of osimertinib in AZ5104. (C) Mechanism of action of osimertinib and AZ5104. Created with [Biorender.com](#).

1.2.2. Gefitinib

29

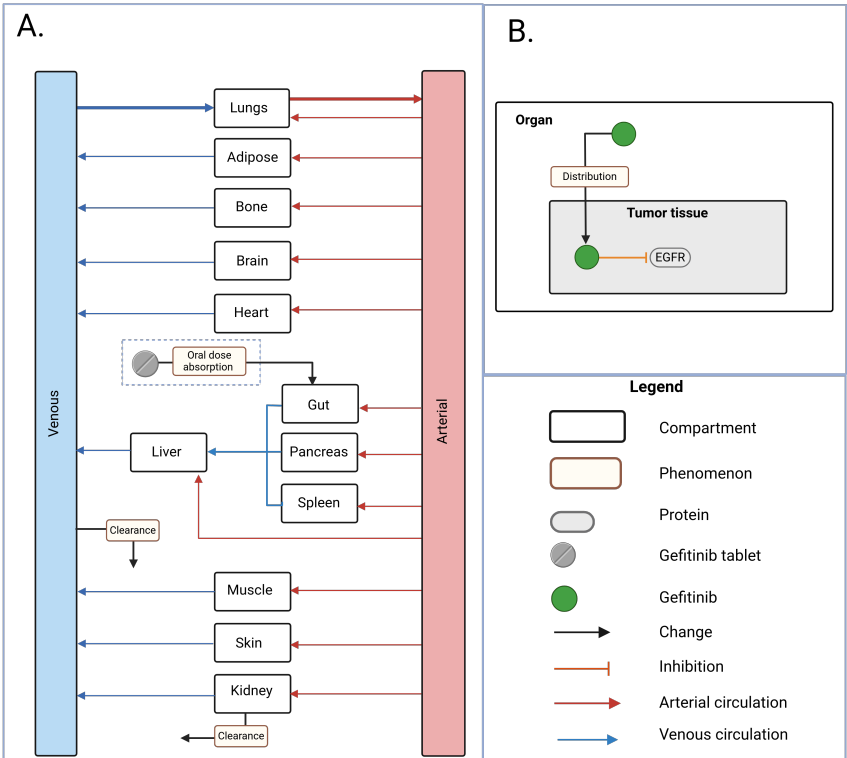

**Figure S7.** Representation of the gefitinib treatment submodel.(A) Pharmacokinetic model of gefitinib. (B) Mechanism of action of gefitinib. Created with [Biorender.com](#).

1.3. Virtual population expansion

Finally, the virtual population of the ISELA-V1 model was expanded to overcome a limiting hypothesis: that the metastatic state of the patients remains the same. By duplicating the disease model enhanced from ISELA-V1 for each potential metastase, ISELA-V2 can describe the emergence and growth of LUAD metastases in parallel to the primary lung tumor. The driving hypothesis is that the growth of each modeled metastasis (MT) follows the same model as the primary tumor (PT), with specific adaptations related to local distinctive characteristics and initial size.

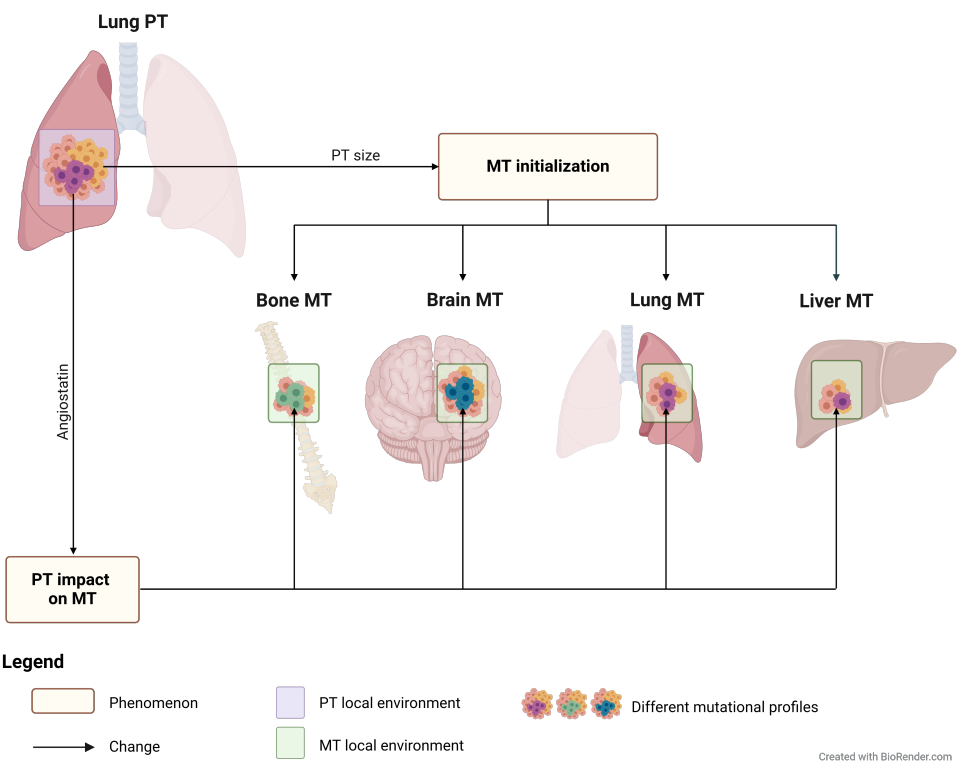

**Figure S8.** Representation of the metastasis submodel. Created with [Biorender.com](#).

1.4. Graphical illustration of the ISELA-V2 model

ISELA-V2 model is illustrated hereafter:

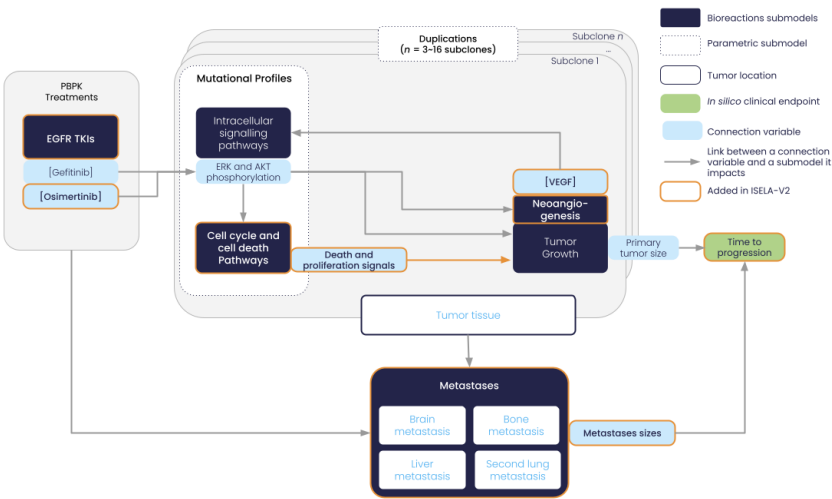

**Figure S9.** Structure of the ISELA-V2 model: the different submodels are labeled and their connecting variables are represented in light blue. The two main model outputs are also represented (i) the biological one, corresponding to the radius of the primary & metastases tumors; (ii) the clinical one, corresponding to the time at which the disease progressed, as defined according to the RECIST (Response Evaluation Criteria In Solid Tumors) guidelines (version 1.1) [1].

2. Structure of the PBPK model

40

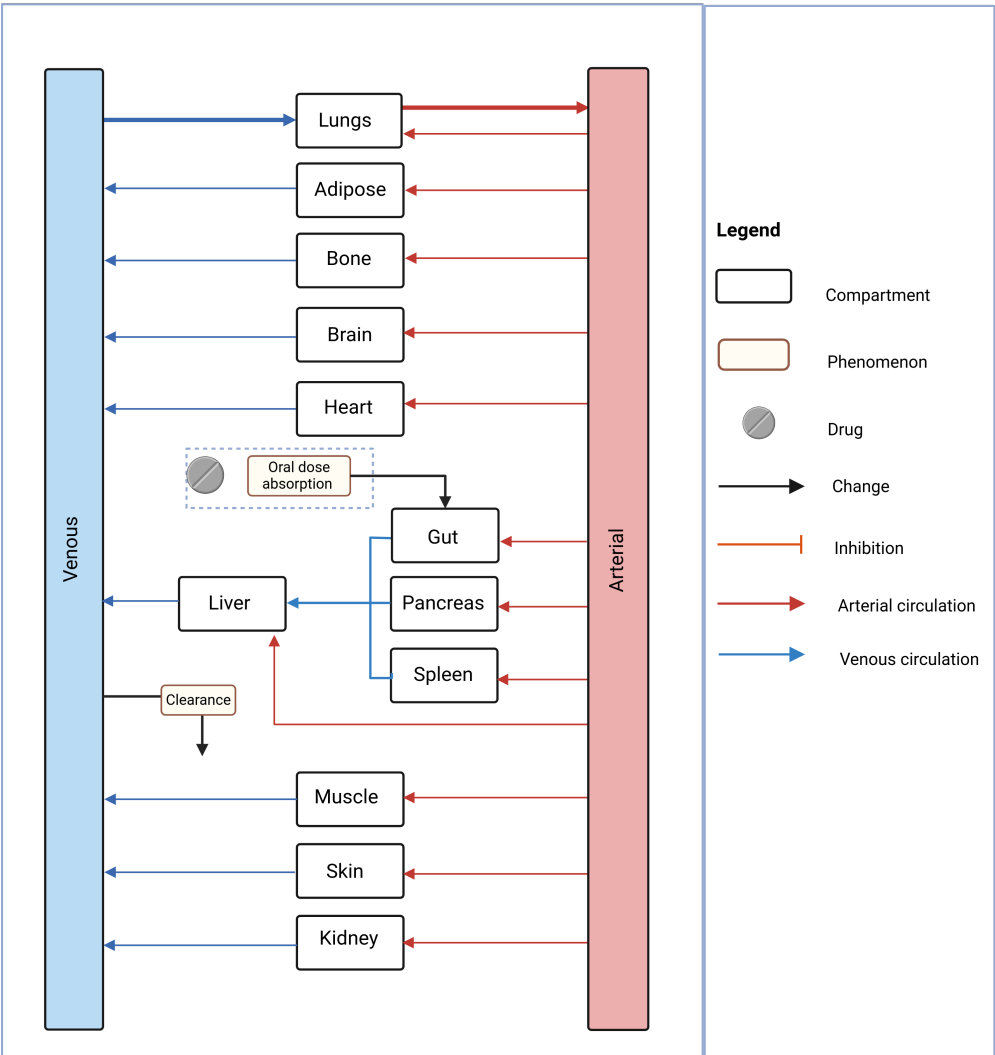

**Figure S10.** Representation of the PBPK structure used to build osimertinib and gefitinib PBPK models. Created with [Biorender.com](#).

PBPK models are pharmacokinetic models which predict the concentration over time of a drug in multiple tissues and fluids by explicitly taking into consideration tissue physiology and anatomy as well as drug physico-chemical properties and biochemistry. This knowledge is used to predict the drug’s interactions with the organism in terms of its absorption, distribution, metabolism and excretion (ADME). Once those phenomena are modeled using a mechanistic representation of physiological processes, the concentration-time profile of the drug can be established in multiple compartments, including the one where the drug elicits its pharmacodynamic action. The PBPK model is composed of a number of organs where the drug can be distributed. Each organ is represented as a compartment with its anatomical and physiological properties. To each compartment of the model is associated a blood flow rate, a volume and a tissue partition coefficient. The compartments in the model are linked by the arterial and venous compartments. The Figure S10 represents the different organs modeled and their impact on the drug. To include the differences observed in physiology across age and gender, the weight of the organs and their associated blood supply are age and sex dependent with the values being taken from the ICRP 23 [2].

41  
42  
43  
44  
45  
46  
47  
48  
49  
50  
51  
52  
53  
54  
55  
56

## 2.1. Absorption

Mechanisms regulating absorption after oral administration are multiple, including diverse mechanisms as drug disintegration and dissolution, degradation, gastric emptying, intestinal transit, intestinal permeation, intestinal and hepatic metabolism, and can be quite complex, as they are governed by the properties of both the compound (pKa, lipophilicity) and the gastrointestinal tract (gastrointestinal pH, gastric metabolism, etc.) [3]. However, in our approach, as we already have the pharmacokinetic data in humans and it is not the objective to predict the drug concentration in a different context than the recommended dose, we implemented a simple absorption model inspired by classical PK models. We added a symbolic compartment called “Administration” where the drug is placed at time of administration. This amount of drug is equal to the drug dose multiplied by a factor called  $k_{FractionAbsorbed}$  to account for the known bioavailability of the drug. Then the drug will diffuse to the gut compartment modeled with a mass action kinetic law.

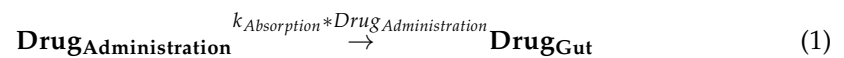

## 2.2. Distribution

Drug distribution is the reversible partitioning of a drug from the systemic blood circulation into the different tissues of the body. It is driven by blood flow rates or the ability of drugs to cross membrane barriers. It leads to defined proportions in the different tissues at steady-state. Drug distribution occurs for each and every administration route. There seems to be a consensus on distribution models emerging from the literature. The subsequent equations take into account the hypothesis that organs are considered well-stirred compartments. A well-stirred compartment is a compartment in which the drug concentration is uniform and any incoming drug is instantaneously distributed. Under the well-stirred assumption, distribution of a drug into a compartment can be modeled as rate-limited by one of two processes: perfusion or permeability. In every organ, the hypothesis that the rate was limited by perfusion was made. Perfusion-rate limited kinetics occur for many small-molecules and lipophilic drugs and mean that the rate of distribution is only limited by blood flow. It is assumed that drugs can diffuse easily and rapidly into the interstitial and intracellular spaces and that unbound drug concentrations are equal on each side of the cell membrane [4].

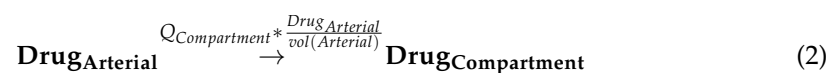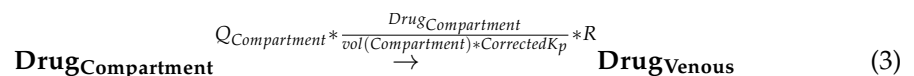

With

$$\text{CorrectedKp} = f_{VS}^X + K_p^S * K_p^X * (1 - f_{VS}^X) \quad (4)$$

And

- $R$ : blood to plasma concentration ratio
- $f_{VS}^X$ : fractional volume of vascular space in organ X
- $K_p^X$ : tissue-to-plasma ratio in organ X, calculated following the distribution theory proposed by Rodgers And Rowland [5]
- $K_p^S$ :  $K_p$  scalar which is a fitted factor common to all  $K_p$

The exception to those equations being the liver as it receives blood from the arterial circulation as well as the gut, pancreas and spleen:

$$\begin{aligned} \frac{dDrug_{Liver}}{dt} = & Q_{Liver_{In}} * \frac{Drug_{Arterial}}{vol(Arterial)} + Q_{Gut} * \frac{Drug_{Gut} * R}{vol(Gut) * CorrectedKp_{Gut}} \\ & + Q_{Spleen} * \frac{Drug_{Spleen} * R}{vol(Spleen) * CorrectedKp_{Spleen}} \\ & + Q_{Pancreas} * \frac{Drug_{Pancreas} * R}{vol(Pancreas) * CorrectedKp_{Pancreas}} \\ & - Q_{Liver_{Out}} * \frac{Drug_{Liver} * R}{vol(Liver) * CorrectedKp_{Liver}} \end{aligned} \quad (5)$$

### 2.3. Elimination/Metabolism

The general goal of metabolism is to render molecules more polar and hydrophilic to make them more easily excreted in urine [6]. In our PBPK models, we grouped the metabolism and elimination of the drug under a venous plasmatic clearance of the drug.

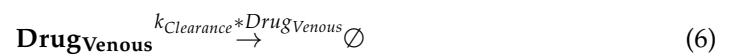

The only exception is osimertinib for which one of its metabolites (AZ5104) is active and present in a non-negligible concentration with respect to osimertinib and for which the metabolization was modeled. The following reaction represents the metabolization of osimertinib to AZ5104:

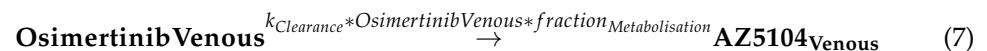

Note that to conserve the quantity of drug, the plasmatic clearance of osimertinib has been multiplied by (1-fractionMetabolisation). The fraction of metabolization to AZ5104 has been informed by the literature and is equal to 0.25 in humans [7] and 0.7 [8] in mice.

The parameters that have been calibrated in order to reproduce the pharmacokinetic data are:  $k_{clearance}$ ,  $k_{absorption}$ ,  $k_{FractionAbsorbed}$  and  $K_p^S$  for gefitinib, osimertinib and AZ5104.

### Abbreviations

The following abbreviations are used in this manuscript:

|        |                                                |
|--------|------------------------------------------------|
| ADME   | Absorption Distribution Metabolism Elimination |
| AKT    | Protein Kinase B                               |
| DNA    | Deoxyribonucleic acid                          |
| EGFR   | Epidermal Growth Factor Receptor               |
| ERK    | Extracellular signal-regulated kinase          |
| ISELA  | In Silico EGFR Lung Adenocarcinoma             |
| LUAD   | Lung Adenocarcinoma                            |
| MT     | Metastasis                                     |
| PK     | Pharmacokinetics                               |
| PBPK   | Physiologically based pharmacokinetics         |
| PT     | Primary tumor                                  |
| RECIST | Response Evaluation Criteria In Solid Tumors   |

### References

1. E.A. Eisenhauer et al. , New response evaluation criteria in solid tumours: Revised RECIST guideline (version 1.1). *European Journal of Cancer* **2009**
2. ICRP, Report of the Task Group on Reference Man. ICRP Publication 23. Pergamon Press, Oxford. **1975**
3. Huang W, Lee SL, Yu LX, Mechanistic approaches to predicting oral drug absorption. *AAPS* **2009**, 11(2), 217-24.
4. Mayumi K, Ohnishi S, Hasegawa H., Successful Prediction of Human Pharmacokinetics by Improving Calculation Processes of Physiologically Based Pharmacokinetic Approach. *J Pharm Sci* **2019**, 108(8), 2718-2727.

5. Rodgers T, Rowland M., Physiologically based pharmacokinetic modelling 2: predicting the tissue distribution of acids, very weak bases, neutrals and zwitterions. *J Pharm Sci* **2006**, *95*(6), 1238-57. 120
6. Nikhil TaxakPrasad V Bharatam, Drug Metabolism: A Fascinating Link Between Chemistry and Biology. *Resonance Journal of Science Education* **2014**, *19*(3), 259-282. 121
7. Brown K, Comisar C, Witjes H, Maringwa J, de Greef R, Vishwanathan K, Cantarini M, Cox E., Population pharmacokinetics and exposure-response of osimertinib in patients with non-small cell lung cancer. *Br J Clin Pharmacol.* **2017**, *83*(6), 1216-1226. 122
8. James W.T. Yates; Susan Ashton; Darren Cross; Martine J. Mellor; Steve J. Powell; Peter Ballard, Irreversible Inhibition of EGFR: Modeling the Combined Pharmacokinetic–Pharmacodynamic Relationship of Osimertinib and Its Active Metabolite AZ5104 . *Mol Cancer Ther* **2016**, *15*(10), 2378-2387. 123

**Disclaimer/Publisher’s Note:** The statements, opinions and data contained in all publications are solely those of the individual author(s) and contributor(s) and not of MDPI and/or the editor(s). MDPI and/or the editor(s) disclaim responsibility for any injury to people or property resulting from any ideas, methods, instructions or products referred to in the content. 124
