# Supplementary material for: Comparing the Efficacy of Two Generations of EGFR-TKIs: An Integrated Drug-Disease Mechanistic Model Approach in Egfr-Mutant Lung Adenocarcinoma
Source: Preprints.org preprint supplement (doi:10.20944/preprints202402.0640.v1), 2024-02-12
Supplement: Supplementary file 1 [file supplementary › PatientDescriptors_PM.xls]

## Sheet: Descriptors
Descriptor name	Description	Distribution	Unit	Reference
age	Age of the virtual patient	NormalTruncated (66.7,11,30,110)	Year	Arbitrary
deltaCellDeathInhibEq	Value of the impact of AKT for its max impact on cell death inhibition is halved.	Uniform (0.04,0.02)	Dimensionless	Calibrated
egfrAmpOsimertinibFirstLineIncidence	Descriptor whose distribution is the frequency of Egfr amplification as a mechanism of resistance to Osimertinib first line. The reference distribution was scaled so that osimertinib resistance mutation frequencies sum up to 1.	Bernoulli(0.119)	Dimensionless	Adam J. Schoenfeld et al. (2020, January). Tumor Analyses Reveal Squamous Transformation and Off-Target Alterations As Early Resistance Mechanisms to First-line Osimertinib in EGFR-Mutant Lung Cancer. Clinical Cancer Research, 10.1158/1078-0432.CCR-19-356
egfrC797sOsimertinibFirstLineIncidence	Descriptor whose distribution is the frequency of Egfr C797S as a mechanism of resistance to Osimertinib first line. The reference distribution was scaled so that osimertinib resistance mutation frequencies sum up to 1.	Bernoulli(0.262)	Dimensionless	Adam J. Schoenfeld et al. (2020, January). Tumor Analyses Reveal Squamous Transformation and Off-Target Alterations As Early Resistance Mechanisms to First-line Osimertinib in EGFR-Mutant Lung Cancer. Clinical Cancer Research, 10.1158/1078-0432.CCR-19-356
egfrT790mGefitinibInducedIncidence	Incidence of EGFR T790M mutation induced by gefitinib. Rescaled to a higher value because only T790M EGFR mutation and MET amplification were implemented in the model.	Bernoulli(0.85)	Dimensionless	Morgillo, F.; Della Corte, C.M.; Fasano, M.; Ciardiello, F. Mechanisms of resistance to EGFR-targeted drugs:Lung cancer. ESMO Open 2016, 1, e000060
egfrT790mMutatedTumor1LineIncidence	Boolean indicating the presence of EGFR T790M mutation in the primary tumor for 1st line patients. The distribution indicates the frequency of the EGFR T790M mutation in a treatment naive population.	Bernoulli(0.05)	Dimensionless	Riyaz Shah, Jason F. Lester Tyrosine Kinase Inhibitors for the Treatment of EGFR Mutation-Positive Non–Small-Cell Lung Cancer: A Clash of the Generations. Clinical Lung Cancer, 10.1016/j.cllc.2019.12.003
ethnicity	Equal to 1 if Asian, otherwise equals 2	Categorical (1:0.55,2:0.45)	Dimensionless	Afatinib versus gefitinib as first-line treatment of patients with EGFR mutation-positive non-small-cell lung cancer (LUX-Lung 7): a phase 2B, open-label, randomised controlled trial.
initialBclhoLargePT	For large size primary tumors, 5-digit number encoding the initial presence (1) or absence (0) of observable metastases in the following organs in this order: Bone (B), Brain (C for cerebrum/cerebellum), Lung (L), Liver (H for hepatic), Other (O). Distrib	Categorical(10000:0.1438,01000:0.1573,00010:0.0318,00100:0.129,11000:0.0555,10010:0.0388,10100:0.0665,01010:0.0114,01100:0.0456,00110:0.0167,11010:0.016,11100:0.0295,10110:0.0267,01110:0.0086,11110:0.0179,00001:0.2049)	Dimensionless	Qinge Shan et al. (2019, October). Relationship between tumor size and metastatic site in patients with stage IV non-small cell lung cancer: A large SEER-based study. PeerJ, 10.7717/peerj.7822
initialBclhoMidPT	For mid size primary tumors, 5-digit number encoding the initial presence (1) or absence (0) of observable metastases in the following organs in this order: Bone (B), Brain (C for cerebrum/cerebellum), Lung (L), Liver (H for hepatic), Other (O). Distribut	Categorical(10000:0.1736,01000:0.1456,00010:0.0318,00100:0.1283,11000:0.0558,10010:0.0394,10100:0.0642,01010:0.0107,01100:0.0419,00110:0.0151,11010:0.0208,11100:0.0298,10110:0.0263,01110:0.0054,11110:0.0177,00001:0.1936)	Dimensionless
initialBclhoSmallPT	For small size primary tumors, 5-digit number encoding the initial presence (1) or absence (0) of observable metastases in the following organs in this order: Bone (B), Brain (C for cerebrum/cerebellum), Lung (L), Liver (H for hepatic), Other (O). Distrib	Categorical(10000:0.1919,01000:0.1418,00010:0.0358,00100:0.1289,11000:0.0515,10010:0.0425,10100:0.0563,01010:0.0097,01100:0.0283,00110:0.0123,11010:0.0155,11100:0.0207,10110:0.0227,01110:0.0042,11110:0.0105,00001:0.2274)	Dimensionless
initialTNM	Initial TNM stage. Encoded by concatenation of the grade of the 3 categories to a 3-digit number, respectively the T, N then M in that order.	Categorical(120: 0, 220: 0, 310: 0, 400: 0, 410: 0, 130: 0.020586, 230: 0.010366, 320: 0.07227, 420: 0.042778, 101: 0.237569136, 111: 0.06426777, 121: 0.12853554, 131: 0.012853554, 201,:0.118555696, 211: 0.03207197, 221: 0.06414394, 231: 0.006414394, 301:	Dimensionless	Fu Yang et al. (2010, September). Relationship between tumor size and disease stage in non-small cell lung cancer. BMC Cancer, 10.1186/1471-2407-10-474 Qinge Shan et al. (2019, October). Relationship between tumor size and metastatic site in patients with
initSizeCatBoneMT	Initial size category for bone metastasis. Used for initialization of tumor radius. Assumed identical to size distribution of brain metastasis in the absence of specific data.	Categorical(1: 0.242, 2: 0.435, 3: 0.323)	Dimensionless	Amarnath Jena et al. (2008, May). Magnetic Resonance (MR) Patterns of Brain Metastasis in Lung Cancer Patients: Correlation of Imaging Findings with Symptom. Journal of Thoracic Oncology, 10.1097/JTO.0b013e318161d775
initSizeCatBrainMT	Initial size category for brain metastasis. Used for initialization of tumor radius.	Categorical(1: 0.242, 2: 0.435, 3: 0.323)	Dimensionless
initSizeCatLiverMT	Initial size category for liver metastasis. Used for initialization of tumor radius. Assumed identical to size distribution of brain metastasis in the absence of specific data.	Categorical(1: 0.242, 2,:0.435, 3: 0.323)	Dimensionless
initSizeCatLungMT	Initial size category for lung metastasis. Used for initialization of tumor radius. Assumed identical to size distribution of brain metastasis in the absence of specific data.	Categorical(1: 0.242, 2: 0.435, 3: 0.323)	Dimensionless
initSizeMicroMTIfPresentFirstLine	Initial size (diameter) for metastases not reported at baseline, when first line treatment is provided. Considering the advance stage of the simulated patients, metastases that are not reported at baseline may still be present, but with a radius lower tha	LogNormalTruncated(-2.75, 1.0, 5.6e-4, 0.1, 10.0)	Centimeters	Calibrated
isBrafMutatedTumor	Indicator function of the BRAF mutation in the tumor.	Bernoulli(0.0656)	Dimensionless	Diverse EGFR Exon 20 Insertions and Co-Occurring Molecular Alterations Identified by Comprehensive Genomic Profiling of NSCLC
isCdk4Cdk6Clonal	Indicator function of the clonality of Cdk4 Cdk6 mutation in tumor.	Bernoulli(0.75)	Dimensionless	Tracking the Evolution of Non–Small-Cell Lung Cancer M. Jamal_Hanjani, G.A. Wilson
isCdk4Cdk6MutatedTumor	Indicator function of the CDK4 or CDK6 mutation in tumor.	Bernoulli(0.033)	Dimensionless	CBioPortal (2)
isCdk4Cdk6MutAcquiredInMT	Boolean representing whether Cdk4Cdk6 mutation may appear in the secondary tumor.	Bernoulli(0.02)	Dimensionless	See additional information (1)
isCdkn2aClonal	Indicator function of the clonality of Cdkn2a mutation in tumor.	Bernoulli(0.6)	Dimensionless	Tracking the Evolution of Non–Small-Cell Lung Cancer M. Jamal_Hanjani, G.A. Wilson
isCdkn2aMutatedTumor	Indicator function of the CDKN2A mutation in tumor.	Bernoulli(0023)	Dimensionless	CBioPortal (2)
isCdkn2aMutAcquiredInMT	Boolean representing whether Cdkn2a mutation may appear in the secondary tumor.	Bernoulli(0.02)	Dimensionless	See additional information (1)
isCtnnb1Clonal	Indicator function of the clonality of Ctnnb1 mutation in tumor.	Bernoulli(0.33)	Dimensionless	Tracking the Evolution of Non–Small-Cell Lung Cancer M. Jamal_Hanjani, G.A. Wilson
isCtnnb1MutatedTumor	Indicator function of the Ctnnb1 mutation.	Bernoulli(0.07)	Dimensionless	CBioPortal (2)
isCtnnb1MutAcquiredInMT	Boolean representing whether Ctnnb1 mutation may appear in the secondary tumor.	Bernoulli(0.02)	Dimensionless	See additional information (1)
isEgfrMutatedTumor	Indicator function of the EGFR mutation.	Bernoulli(1)	Dimensionless	Context of use of the model
isExon20Resistant	Indicates whether the exon 20 insertion mutation results in TKI resistance or not. The default 1 indicates a resistant insertion, 0 indicates a sensitive insertion. It will only be used when the patient carries exon 20 insertion.	Bernoulli(0.92)	Dimensionless	Riess JW, Gandara DR, Frampton GM, Madison R, Peled N, Bufill JA, Dy GK, Ou SI, Stephens PJ, McPherson JD, Lara PN Jr, Burich RA, Ross JS, Miller VA, Ali SM, Mack PC, Schrock AB. Diverse EGFR Exon 20 Insertions and Co-Occurring Molecular Alterations Ident
isKrasClonal	Indicator function of the clonality of KRAS mutation in tumor.	Bernoulli(0.893)	Dimensionless	Tracking the Evolution of Non–Small-Cell Lung Cancer M. Jamal_Hanjani, G.A. Wilson
isKrasMutatedTumor	Indicator function of the KRAS mutation in tumor.	Bernoulli(0.025)	Dimensionless	CBioPortal (2)
isKrasMutAcquiredInMT	Boolean representing whether Kras mutation may appear in the secondary tumor.	Bernoulli(0.02)	Dimensionless	See additional information (1)
isMale	Boolean. If patient is a male, it is equal to 1, if female, it is equal to 0.	Bernoulli(0.33)	Dimensionless	Arbitrary
isMetMutatedTumor	Indicator function of the MET mutation in tumor.	Bernoulli(0.0492)	Dimensionless	Diverse EGFR Exon 20 Insertions and Co-Occurring Molecular Alterations Identified by Comprehensive Genomic Profiling of NSCLC
isPik3caClonal	Indicator function of the clonality of PIK3CA mutation.	Bernoulli(0.6)	Dimensionless	Tracking the Evolution of Non–Small-Cell Lung Cancer M. Jamal_Hanjani, G.A. Wilson
isPik3caMutatedTumor	Indicator function of the PIK3CA mutation in tumor.	Bernoulli(0.074)	Dimensionless	CBioPortal (2)
isPik3caMutAcquiredInMT	Boolean representing whether Pik3ca mutation may appear in the secondary tumor.	Bernoulli(0.02)	Dimensionless	See additional information (1)
isPtenClonal	Indicator function of the clonality of PTEN mutation in tumor.	Bernoulli(0.75)	Dimensionless	Tracking the Evolution of Non–Small-Cell Lung Cancer M. Jamal_Hanjani, G.A. Wilson
isPtenMutatedTumor	Indicator function of the PTEN mutation in tumor.	Bernoulli(0.041)	Dimensionless	CBioPortal (2)
isPtenMutAcquiredInMT	Boolean representing whether Pten mutation may appear in the secondary tumor.	Bernoulli(0.02)	Dimensionless	See additional information (1)
isRbClonal	Indicator function of the clonality of Rb mutation in tumor.	Bernoulli(0.6)	Dimensionless	Tracking the Evolution of Non–Small-Cell Lung Cancer M. Jamal_Hanjani, G.A. Wilson
isRbMutatedTumor	Indicator function of the RB mutation in tumor.	Bernoulli(0.073)	Dimensionless	CBioPortal (2)
isRbMutAcquiredInMT	Boolean representing whether Rb mutation may appear in the secondary tumor.	Bernoulli(0.02)	Dimensionless	See additional information (1)
isResMutOsiIdenticalInMT	Boolean representing whether all tki resistance mutations will be shared between primary tumor and all metastases.	Bernoulli(0.7)	Dimensionless	Discussions with clinicians
isTp53Clonal	Indicator function of the clonality of Tp53 mutation in tumor.	Bernoulli(0.85)	Dimensionless	Tracking the Evolution of Non–Small-Cell Lung Cancer M. Jamal_Hanjani, G.A. Wilson
isTp53MutatedTumor	Indicator function of the TP53 mutation.	Bernoulli(0.554)	Dimensionless	CBioPortal (2)
isTp53MutAcquiredInMT	Boolean representing whether Tp53 mutation may appear in the secondary tumor.	Bernoulli(0.15)	Dimensionless	See additional information (1)
kaKccEcmLivingHumanRef	Increase rate of the proliferation carrying capacity according to the endothelial cell mature pool in humans.	Uniform(8e5,1.6e6)	scount * millimeter * millimeter /second	Calibrated
kdKccEcmLivingHumanRef	Decrease rate of the proliferation carrying capacity according to the endothelial cell mature pool in humans.	Uniform(5e-5,8e-5)	millimeter	Calibrated
kmKillingCellsByISSmallHuman	Michaelis-Menten constant of proliferative and quiescent cells for killing and removal by the immune system to use a Mixture law.	Mixture 0.9631*NormalTruncated(6.51, 1.57, 3, 10)+0.0369*NormalTruncated(9.87,0.0797, 3, 10)	scount	Calibrated
kProdIapRef	Production rate of Iap.	NormalTruncated(1.5e-3, 3.5e-3, 5.0e-4, 1.5e-2)	nmole/liter/second	Calibrated
krasAmpOsimertinibFirstLineIncidence	Descriptor whose distribution is the frequency of KRAS amplification as a mechanism of resistance to first line Osimertinib. The reference distribution was scaled so that osimertinib resistance mutation frequencies sum up to 1.	Bernoulli(0.095)	dimensionless	Adam J. Schoenfeld et al. (2020, January). Tumor Analyses Reveal Squamous Transformation and Off-Target Alterations As Early Resistance Mechanisms to First-line Osimertinib in EGFR-Mutant Lung Cancer. Clinical Cancer Research, 10.1158/1078-0432.CCR-19-356
logKdCellsByISHuman	Log of catalytic constant of proliferating or quiescent cell eliminated by the immune system and removal.	Mixture 0.044*NormalTruncated(9, 0.00249, 9, 10)+0.956*NormalTruncated(9.45, 0.18518, 9, 10)	dimensionless	Calibrated
logKiBarrierCellThicknessHuman	Log of inhibition constant of immune system barrier cells thickness on immune system efficacy.	NormalTruncated(8.49289, 0.8458285, 8, 11)	dimensionless	Calibrated
logResistantSubCloneInitialSizeGefitinib	Log of initial number of cells in primary tumor harboring the treatment-induced resistance for gefitinib.	NormalTruncated(4.5,3.24,0,8.4)	dimensionless	Calibrated
logResistantSubCloneInitialSizeOsimertinibFirstLine	Log of initial number of cells in primary tumor harboring the treatment-induced resistance for osimertinib 1st line.	NormalTruncated(2.1,0.5,0,8.4)	dimensionless	Calibrated
maxCellDeathInhibEq	Maximal inhibition by the impact of AKT on cell death.	Uniform(0.7961,0.8927)	dimensionless	Calibrated
metAmpGefitinibInducedIncidence	Indicator function of the MET amplification induced by gefitinib.Rescaled to a higher value because only T790M EGFR mutation and MET amplification were implemented in the model.	Bernoulli(0.3)	dimensionless	Bean J, Brennan C, Shih JY, Riely G, Viale A, Wang L, Chitale D, Motoi N, Szoke J, Broderick S, Balak M, Chang WC, Yu CJ, Gazdar A, Pass H, Rusch V, Gerald W, Huang SF, Yang PC, Miller V, Ladanyi M, Yang CH, Pao W. MET amplification occurs with or without
metAmpOsimertinibFirstLineIncidence	Descriptor whose distribution is the frequency of MET amplification as a mechanism of resistance to Osimertinib. The reference distribution was scaled so that osimertinib resistance mutation frequencies sum up to 1.	Bernoulli(0.357)	dimensionless	Chiara Lazzari et al. (2020, May). Mechanisms of resistance to osimertinib. Journal of Thoracic Disease, 10.21037/jtd.2019.08.30
mutEgfr	Encodes the type of EGFR mutation. Equals 19 when the mutation is exon 19 deletion. Equals 20 when the mutation is exon 20 insertion. Equals 21 when the mutation is L858R on exon 21.	Categorical(19, 0.516, 20, 0.132, 21, 0.352)	dimensionless	Riess JW, Gandara DR, Frampton GM, Madison R, Peled N, Bufill JA, Dy GK, Ou SI, Stephens PJ, McPherson JD, Lara PN Jr, Burich RA, Ross JS, Miller VA, Ali SM, Mack PC, Schrock AB. Diverse EGFR Exon 20 Insertions and Co-Occurring Molecular Alterations Ident
nSubclonesDecimalWithoutResistantSubclone	Number of subclones constituting the tumor	LogNormalTruncated (0.7, 0.33, 1.51, 15.49,10)	dimensionless	Calibrated
pik3caActOsimertinibFirstLineIncidence	Descriptor whose distribution is the frequency of PIK3CA mutation as a mechanism of resistance to Osimertinib first line. The reference distribution was scaled so that osimertinib resistance mutation frequencies sum up to 1.	Bernoulli(0.167)	dimensionless	Adam J. Schoenfeld et al. (2020, January). Tumor Analyses Reveal Squamous Transformation and Off-Target Alterations As Early Resistance Mechanisms to First-line Osimertinib in EGFR-Mutant Lung Cancer. Clinical Cancer Research, 10.1158/1078-0432.CCR-19-356
pyBaseP38	Phosphorylation rate of P38 without external DNA damaging agent.	NormalTruncated(0.55, 0.20, 5.0e-2, 0.6)	dimensionless	Calibrated
smokingStatus	Parameter encoding for the patient smoking status. -1 represents never smokers. 0 represents former smokers. 1 represents current smokers.	Categorical(-1: 0.2258, 0: 0.2016, 1:0.5726)	dimensionless	Clinical Lung Cancer Genome Project (CLCGP); Network Genomic Medicine (NGM). A genomics-based classification of human lung tumors. Sci Transl Med. 2013 Oct 30;5(209):209ra153. doi: 10.1126/scitranslmed.3006802
subclonalityCdk4Cdk6Mutated	Boolean indicating the presence of the mutation in the subclone. The distribution indicates the frequency of apparition of Cdk4 and Cdk6 mutation in subclones.	Bernoulli(0.5)	dimensionless	Arbitrary
subclonalityCdkn2aMutated	Boolean indicating the presence of the mutation in the subclone. The distribution indicates the frequency of apparition of Cdkn2a mutation in subclones.	Bernoulli(0.5)	dimensionless	Arbitrary
subclonalityCtnnb1Mutated	Boolean indicating the presence of the mutation in the subclone. The distribution indicates the frequency of apparition of Ctnnb1 mutation in subclones.	Bernoulli(0.5)	dimensionless	Arbitrary
subclonalityKrasMutated	Boolean indicating the presence of the mutation in the subclone. The distribution indicates the frequency of apparition of KRAS mutation in subclones.	Bernoulli(0.5)	dimensionless	Arbitrary
subclonalityPik3caMutated	Boolean indicating the presence of the mutation in the subclone. The distribution indicates the frequency of apparition of PIK3CA mutation in the subclones.	Bernoulli(0.5)	dimensionless	Arbitrary
subclonalityPtenMutated	Boolean indicating the presence of the mutation in the subclone. The distribution indicates the frequency of apparition of PTEN mutation in subclones.	Bernoulli(0.5)	dimensionless	Arbitrary
subclonalityRbMutated	Boolean indicating the presence of the mutation in the subclone. The distribution indicates the frequency of apparition of Rb mutation in subclones.	Bernoulli(0.5)	dimensionless	Arbitrary
subclonalityTp53Mutated	Boolean indicating the presence of the mutation in the subclone. The distribution indicates the frequency of apparition of Tp53 mutation in subclones.	Bernoulli(0.5)	dimensionless	Arbitrary
typeOfTp53Mutation	Type of Tp53 mutation. By default value is equal to R273 for a mutation of type R273H. Value is equal to 248 for a mutation of type R248W and equal to 175 for a mutation of type R175H.	Categorical(273: 0.379, 248: 0.342, 175: 0.279)	dimensionless	Julie A Barta et al. (2019, May). The lung-enriched p53 mutants V157F and R158L/P regulate a gain of function transcriptome in lung cancer. Carcinogenesis, 10.1093/carcin/bgz087
vcE2fTot	Total concentration of E2F.	NormalTruncated(1.479, 0.25, 1.4, 2.0)	micromole/liter	Calibrated
Note: The distributions given here corresponds to a reference EGFR mutated LUAD population but can be changed in order to match a specific population (within the context of use the model)

## Sheet: Additional information
Law	Description
Uniform(a,b)	A uniform distribution over the interval [a,b] (continuous)
LogUniform(a,b,base)	x follows a log-uniform distribution means log(x)/log(base) follows a uniform distribution over the interval [a,b] (continuous)
Normal (_,_)	A normal distribution with mean _ and standard deviation _ (continuous)
NormalTruncated (_,_,a,b)	A normal distribution with mean _ and standard deviation _ truncated where the random variable is bounded in the interval [a,b] (continuous)
LogNormal (_,_,base)	x follows a log-normal distribution means log(x)/log_(base) follows a normal distribution of mean _ and standard deviation _ (continuous)
LogNormalTruncated (_,_,base,a,b)	Same as LogNormal but truncated over the interval [a,b].
Bernoulli (p)	A Bernoulli distribution with parameter p (probability that the random variable takes value 1) (discrete)
Categorical	The keys are the categories and the probabilities the values. The expected syntax is "Categorical(cat0: prob0, cat1: prob1, ...)"
Mixture	A weighted mixture of distributions. By definition the probability density function (PDF) of a mixture is the weighted sum of the underlying distributions PDFs.
(1): Regarding the presence of specific mutations in the metastases, the following sources were used: - Hongsheng Wang et al. (2019, October). Genes associated with increased brain metastasis risk in non-small cell lung cancer: Comprehensive genomic profi
(2): The request on bioportal (https://bit.ly/3FQjZdB) have been made with the following studies: - Lung Adenocarcinoma (Broad, Cell 2012) - Lung Adenocarcinoma (MSKCC, 2020) - Lung Adenocarcinoma (MSKCC, 2021) - Lung Adenocarcinoma (MSKCC, Science 2015)
